# Supplementary material
Source: Springer Nature journal article supplement (https://www.springerprofessional.de/resource/supplementary/13638_2010_17_MOESM9_ESM.pdf/11897214)

### Packet Delivery Raito Vs Speed

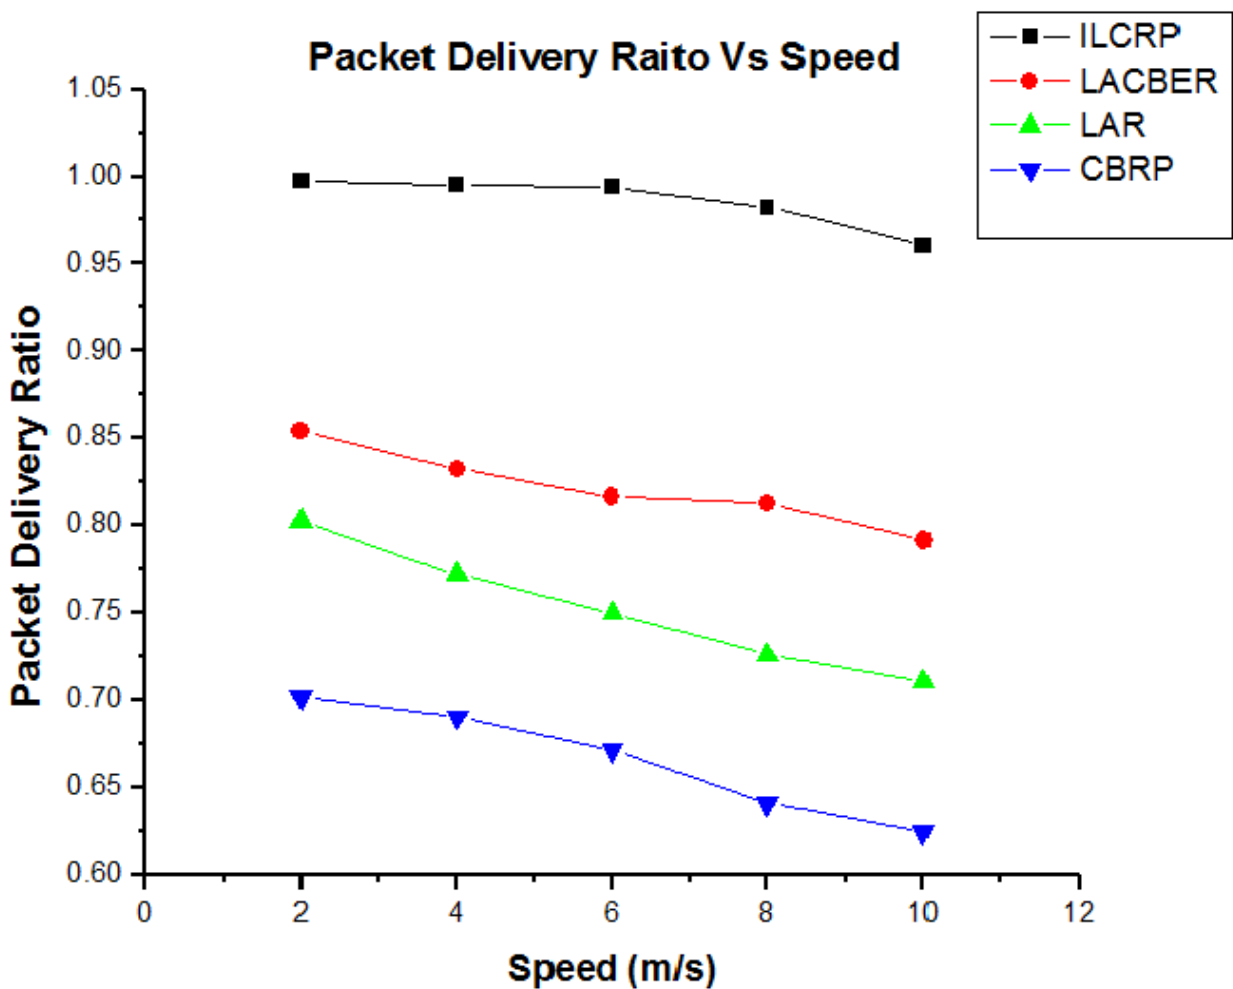

Supplement: MOESM9 [file 11897214]
